# Supplementary material for: Heat in the southeastern United States: Characteristics, trends, and potential health impact
Source: PLoS One. 2017 May 16;12(5):e0177937. doi: 10.1371/journal.pone.0177937 (PMC5433771; doi:10.1371/journal.pone.0177937)
Supplement: S1 File — (CSV) [file pone.0177937.s001.csv]

WMO_ID is the World Meteorological Organization identification number of the station
Latitude and longitude are in degrees
Region is the apparent-temperature region of the station
AT_EHD_1979-2015 is the mean apparent temperature of extreme heat days during June-August from 1979-2015
AT_Mean_1979-2015 is the mean apparent temperature of June-August days from 1979-2015
AT_Deviation is the mean apparent temperature of extreme heat days minus the mean apparent temperature of all days
RCP2.6_AT_2040-2060 is the projected mean apparent temperature for June-August from 2040-2060 under the RCP2.6 scenario
RCP4.5_AT_2040-2060 is the projected mean apparent temperature for June-August from 2040-2060 under the RCP4.5 scenario
RCP8.5_AT_2040-2060 is the projected mean apparent temperature for June-August from 2040-2060 under the RCP8.5 scenario
Unit of apparent temperature is �C
Station	WMO_ID	Latitude	Longitude	Region	AT_EHD_1979-2015	AT_Mean_1979-2015	AT_Deviation	RCP2.6_AT_2040-2060	RCP4.5_AT_2040-2060	RCP8.5_AT_2040-2060
ALBANY	722160	31.53600	-84.19400	2	33.82497	29.20929	4.61567	30.92372	31.73070	32.76957
ALMA BACON	722135	31.53600	-82.50700	6	34.90195	29.94514	4.95681	31.58383	32.36075	33.38319
ANNISTON	722287	33.58700	-85.85600	1	32.13976	27.34166	4.79810	29.04615	29.82862	30.87228
ASHEVILLE	723150	35.43200	-82.53800	4	25.87563	22.73438	3.14125	23.78665	24.24631	24.89744
ATHENS	723110	33.94800	-83.32800	5	32.00140	27.11896	4.88244	29.41054	29.45560	30.46965
ATLANTA	722190	33.63000	-84.44200	1	32.48488	27.36729	5.11759	29.50299	29.49126	30.42088
AUGUSTA	722180	33.36400	-81.96300	5	33.32530	28.22098	5.10433	29.83784	30.71680	31.77545
BEAUFORT	722085	32.48300	-80.71700	5	35.27754	30.25377	5.02377	31.66602	32.52675	33.56818
BIRMINGHAM	722280	33.56600	-86.74500	1	33.02649	28.03256	4.99393	30.12379	30.12830	31.05899
BOB SIKES	722215	30.78000	-86.52300	2	33.90875	28.94750	4.96125	30.67823	31.41710	32.40657
BRUNSWICK	722137	31.15200	-81.39100	6	34.90195	29.94966	4.95229	31.58904	32.37494	33.41926
CHARLESTON	722080	32.89900	-80.04000	5	35.03105	29.60065	5.43040	31.08841	32.00114	33.12161
CHARLOTTE	723140	35.22400	-80.95500	4	31.88708	26.70897	5.17811	28.76841	29.70569	30.69929
CHATTANOOGA	723240	35.03100	-85.20100	1	32.36690	27.17161	5.19529	29.12785	30.05079	31.03521
CHERRY POINT	723090	34.90000	-76.88300	4	33.76061	27.96463	5.79597	29.87295	30.02198	31.03983
COLUMBIA	723100	33.94200	-81.11800	5	33.59572	28.49091	5.10482	30.05343	30.91180	31.95283
COLUMBUS_GA	722255	32.51600	-84.94200	2	33.69640	29.02713	4.66928	30.49769	31.24555	32.17422
COLUMBUS_MS	723306	33.65000	-88.45000	1	34.41580	28.84914	5.56666	30.54445	31.31016	32.31781
CROSSVILLE	723265	35.95100	-85.08100	1	27.69232	23.44732	4.24501	24.47762	24.94307	25.61843
DAYTONA BEACH	722056	29.18300	-81.04800	7	32.98595	29.25597	3.72999	31.00349	31.79767	32.86580
DOTHAM	722268	31.31700	-85.45000	2	34.23851	29.08379	5.15472	30.88446	31.64915	32.66432
DYERSBURG	723347	36.00000	-89.40900	1	35.31973	28.40738	6.91235	30.86144	30.66828	31.61139
FLORENCE	723106	34.18500	-79.72400	4	33.96668	28.16839	5.79829	29.78108	30.66699	31.76878
GAINESVILLE	722146	29.69200	-82.27600	6	32.67449	28.43713	4.23736	30.58849	31.55236	32.75539
GREENVILLE	723120	34.88400	-82.22100	4	31.15953	26.21954	4.93999	28.25263	29.18980	30.17503
GREENWOOD LEFLORE	747580	33.49600	-90.08700	1	34.67251	29.35354	5.31897	31.37504	32.10761	33.17410
HUNTSVILLE	723230	34.64400	-86.78600	1	32.33652	27.20567	5.13085	29.43857	30.43505	31.45367
JACKSON	722350	32.32100	-90.07800	3	33.83625	29.08064	4.75561	31.15764	32.16622	33.23582
JACKSONVILLE_FL	722060	30.49500	-81.69400	6	33.51973	29.24915	4.27058	31.21302	32.04832	33.19945
JACKSONVILLE_NC	723096	34.70800	-77.44000	4	33.71085	28.00901	5.70184	29.58548	30.60952	31.58052
KEESLER	747686	30.41700	-88.91700	3	37.70685	31.83240	5.87445	33.63258	34.40416	35.52435
KEY FIELD	722340	32.33500	-88.74400	3	32.92048	28.29087	4.62961	30.07537	30.86127	31.95820
KEY WEST	722010	24.55500	-81.75200	8	36.58133	33.94009	2.64124	35.46164	36.29913	37.34898
LAFAYETTE	722405	30.20499	-91.98800		35.19963	30.52834	4.67129	32.40111	33.17613	34.34463
LITTLE ROCK	723401	34.72693	-92.23904		35.60235	29.80340	5.79895	31.55256	32.21044	33.15503
LOUISVILLE	724230	38.18110	-85.73907		33.52467	26.74634	6.77832	28.64825	29.36438	30.32005
MACON	722170	32.68500	-83.65300	2	33.44705	28.54538	4.90167	30.16366	31.01117	32.03921
MCCOMB	722358	31.18300	-90.47100	3	32.91653	28.24215	4.67438	30.07986	30.87200	32.03208
MCGHEE TYSON	723260	35.81800	-83.98600	1	30.96478	25.93604	5.02874	27.82056	28.76283	29.75367
MCKELLAR-SIPES	723346	35.59300	-88.91700	1	33.51096	27.55530	5.95566	30.25231	30.21787	31.28889
MELBOURNE	722040	28.10100	-80.64400	7	34.60954	30.63248	3.97706	32.37111	33.20694	34.27488
MEMPHIS	723340	35.05600	-89.98700	1	36.02778	30.15741	5.87037	31.94680	32.44742	33.21453
MERCER COUNTY	724125	37.29601	-81.20800		25.46412	21.60473	3.85938	22.73775	23.21753	23.89102
MIAMI	722020	25.79100	-80.31600	7	35.01308	32.05371	2.95938	33.48543	34.32293	35.37278
MOBILE	722230	30.68800	-88.24600	3	33.50252	29.03973	4.46279	30.91831	31.68002	32.76867
MONROE	722486	32.51603	-92.04097		35.76077	30.39079	5.36997	32.39527	33.17153	34.32678
MONTGOMERY	722260	32.30000	-86.40800	2	33.71549	28.92236	4.79314	30.64225	31.42060	32.42164
MUSCLE SHOALS	723235	34.74400	-87.60000	1	33.15204	27.74416	5.40788	30.05907	30.11490	31.10804
MYRTLE BEACH	747910	33.68300	-78.93300	5	34.70995	29.03001	5.67995	30.31586	31.20429	32.31221
NASHVILLE	723270	36.11900	-86.68900	1	32.86976	27.32463	5.54513	29.32339	30.16031	31.13156
NORFOLK	723080	36.90297	-76.19197		33.71696	27.40920	6.30776	28.86714	29.72082	30.65264
ORLANDO	722050	28.43400	-81.32500	7	33.44646	29.71927	3.72719	31.73340	32.56633	33.72513
PAGE FIELD	722106	26.58500	-81.86100	8	34.44951	30.67665	3.77286	32.68580	33.56382	34.68412
PALM BEACH	722030	26.68500	-80.09900	7	34.50340	31.28721	3.21620	32.90474	33.80368	34.89512
PENSACOLA NAS	722225	30.35000	-87.31700	3	35.47856	30.62998	4.84857	32.42741	33.22123	34.33394
PIEDMONT TRIAD	723170	36.09700	-79.94300	4	30.80407	25.65372	5.15036	26.61577	28.17921	29.11673
POPE	723030	35.17400	-79.00900	4	34.59013	28.29087	6.29927	30.36144	30.45402	31.44279
RALEIGH-DURHAM	723060	35.89200	-78.78200	4	32.24939	26.63352	5.61587	28.47805	29.41452	30.41680
ROANOKE	724110	37.31674	-79.97386		29.62935	24.58985	5.03950	25.61720	26.89508	27.72082
SARASOTA BRADENTON	722115	27.40100	-82.55900	8	36.47198	31.58241	4.88958	33.36801	34.18004	35.27196
SAVANNAH	722070	32.13000	-81.21000	5	34.21697	29.47049	4.74648	31.13953	32.02747	33.12632
SEYMOUR-JOHNSON	723066	35.34400	-77.96500	4	34.37813	28.06097	6.31716	30.25202	30.32100	31.34848
SHAW	747900	33.96700	-80.46700	5	33.24950	27.76739	5.48210	29.30395	30.16795	31.21307
ST LOUIS	724340	38.75300	-90.37405		35.57162	27.76573	7.80589	29.56288	30.21831	31.20635
TALLAHASSEE	722140	30.39300	-84.35300	2	33.59895	29.19074	4.40821	31.01293	31.80752	32.89599
TAMPA	722110	27.96200	-82.54000	8	34.63997	30.92800	3.71197	32.92678	33.73435	34.85275
TUPELO	723303	34.26200	-88.77100	1	34.32935	28.60899	5.72035	30.36580	31.08479	32.05783
TUSCALOOSA	722286	33.21200	-87.61600	1	34.31095	29.02407	5.28688	30.66333	31.45734	32.47676
TYNDALL AFB	747750	30.06700	-85.58300	2	36.38216	31.13722	5.24494	32.88185	33.73664	34.91982
VALDOSTA	722166	30.78300	-83.27700	6	33.48915	28.97211	4.51704	30.81028	31.61899	32.71040
VERO BEACH	747930	27.65100	-80.42000	7	34.07789	30.24040	3.83749	31.95968	32.81638	33.88540
