# Supplementary material for: Heat in the southeastern United States: Characteristics, trends, and potential health impact
Source: PLoS One. 2017 May 16;12(5):e0177937. doi: 10.1371/journal.pone.0177937 (PMC5433771; doi:10.1371/journal.pone.0177937)
Supplement: S4 File — (CSV) [file pone.0177937.s004.csv]

Mean seasonal apparent temperature and frequency of extreme heat days (EHDs) for the eight regions from 1979-2015
Mean values are provided for June, July, August, and June-August
EHD frequency is seasonal (June-August)
The unit of apparent temperature is �C
Year	Region1_June	Region2_June	Region3_June	Region4_June	Region5_June	Region6_June	Region7_June	Region8_June	Region1_July	Region2_July	Region3_July	Region4_July	Region5_July	Region6_July	Region7_July	Region8_July	Region1_August	Region2_August	Region3_August	Region4_August	Region5_August	Region6_August	Region7_August	Region8_August	Region1_JJA	Region2_JJA	Region3_JJA	Region4_JJA	Region5_JJA	Region6_JJA	Region7_JJA	Region8_JJA	Region1_EHD	Region2_EHD	Region3_EHD	Region4_EHD	Region5_EHD	Region6_EHD	Region7_EHD	Region8_EHD
1979	24.4567	25.94255	26.26456	21.72894	24.1981	26.42641	28.5951	30.42263	27.18186	28.36604	28.94858	24.93963	27.92839	29.63591	31.19722	33.34301	26.46013	28.12803	28.48454	25.65043	27.53968	28.46669	29.79973	31.412	26.05003	27.49557	27.917	24.13218	26.58101	28.19536	29.87781	31.74005	0	0	0	0	0	0	0	5
1980	26.22198	27.75415	28.50747	24.12897	25.75352	27.90318	29.14972	31.58659	31.9009	31.44499	32.02827	28.13974	30.30555	31.54615	31.80946	33.08889	29.6908	30.33394	30.86604	27.64486	29.00296	30.50803	31.71963	32.11341	29.30437	29.86708	30.48856	26.66513	28.38228	30.00842	30.91189	32.27032	22	12	19	3	3	9	11	13
1981	27.45526	30.53454	29.95725	27.56354	29.1448	30.58917	30.96068	31.61998	29.30408	31.36874	31.60763	27.74549	30.1925	31.1784	31.98688	32.71657	26.53858	28.1088	30.2093	24.39561	26.36661	27.96416	30.85492	30.91817	27.76935	29.99826	30.59828	26.55739	28.5617	29.9032	31.27083	31.753	8	14	12	10	7	10	10	5
1982	24.5245	27.65061	27.79026	23.90458	26.40038	28.40486	29.33192	31.65036	28.16978	28.33522	28.96012	26.63452	28.25424	28.54818	30.33314	31.85667	26.60883	28.61119	28.98209	25.1683	27.3023	28.87542	30.07316	31.17546	26.45513	28.20496	28.58605	25.25027	27.32896	28.61171	29.91906	31.55986	0	1	0	0	0	1	0	1
1983	23.87291	25.733	24.9175	23.14369	24.53274	25.87153	28.46478	28.62507	29.03595	30.81921	29.59892	27.98598	29.46954	30.44106	31.65147	30.08596	29.5645	30.40804	29.42293	27.64263	29.78986	30.33982	31.10487	30.27015	27.53045	29.02212	28.01307	26.29128	27.96765	28.91688	30.42815	29.67165	11	11	0	12	7	10	7	0
1984	26.07301	26.81226	25.81225	24.73355	26.60223	26.7293	26.73582	29.61929	26.20714	27.18186	27.27361	24.75983	27.03057	27.43598	28.7098	29.8157	25.68385	27.8006	26.98188	25.68664	27.99541	28.76963	29.44633	31.8456	25.98707	27.26983	26.69878	25.06355	27.216	27.65492	28.31429	30.43564	0	0	0	0	0	0	0	0
1985	25.48303	27.742	27.44908	24.74485	27.12292	28.44632	29.59371	31.63455	27.13682	27.80484	27.81716	25.85367	27.92668	28.4258	28.62026	30.47522	26.34725	27.79546	28.40852	24.69415	26.61305	28.0488	30.22833	31.72519	26.33149	27.78119	27.89639	25.10139	27.22195	28.30546	29.47954	31.27445	0	2	0	0	0	4	0	1
1986	26.57637	28.79272	28.11207	26.30836	28.3186	28.4341	28.07646	30.0032	30.37508	31.18156	30.43727	29.61539	31.97045	31.25539	29.53155	31.94871	25.76015	27.80818	28.12413	25.21168	27.76979	28.1096	30.26889	31.23531	27.58134	29.26591	28.89963	27.05315	29.36419	29.27541	29.30551	31.07392	6	6	3	9	11	6	0	2
1987	25.53773	26.85193	26.92264	25.34942	26.5555	27.97253	29.94279	31.385	28.14079	29.40815	29.29588	28.39671	29.70095	30.03401	31.03824	32.11159	29.05058	30.83884	29.77074	27.80055	30.25531	31.4305	32.06569	33.3189	27.59853	29.05668	28.68201	27.20215	28.86206	29.83234	31.02723	32.28147	5	4	0	6	6	10	11	8
1988	25.63711	26.90079	27.12836	23.56548	24.93535	26.97195	28.35899	30.16003	27.63632	28.31277	29.0095	27.25129	28.69669	29.0117	29.71446	31.50794	28.92096	29.19546	29.50816	28.36425	29.20654	29.41617	30.52581	30.9255	27.41727	28.14977	28.56411	26.42441	27.64197	28.48285	29.54585	30.87215	5	0	2	7	2	0	0	0
1989	24.4287	26.84244	27.28858	25.69303	26.71536	27.91681	28.69878	30.47192	26.78011	28.54899	28.52357	26.85473	28.55455	29.2766	30.28522	31.25924	26.89555	29.31742	29.35277	25.65641	27.61848	29.05453	30.70639	31.84646	26.05225	28.25143	28.40026	26.07213	27.6394	28.75836	29.90982	31.20037	0	3	0	3	2	3	0	0
1990	26.43765	28.6618	29.21737	25.39374	27.29527	28.67746	29.08137	30.85913	27.48771	29.93222	29.19342	28.04596	29.72269	30.27294	30.28215	31.02004	27.67451	31.01396	29.7797	26.83863	28.48928	29.86926	30.11189	32.01963	27.20824	29.88245	29.39878	26.77429	28.51553	29.61665	29.83322	31.30439	2	4	2	1	4	6	1	1
1991	25.78641	26.90096	27.34666	24.90607	26.56211	27.66	28.79058	30.14158	28.93038	29.46209	29.93818	28.64018	29.99894	30.09304	30.03188	31.32834	26.99096	28.20586	28.89889	25.93713	28.00651	29.2647	30.98506	32.3449	27.25167	28.20365	28.74292	26.51173	28.20687	29.02054	29.94829	31.28389	4	3	3	5	4	6	2	0
1992	23.58777	26.50573	26.91772	22.89884	24.91115	27.31118	28.15041	30.35902	27.50648	29.68084	30.12041	28.65759	30.12313	30.9127	31.78404	31.92302	24.04014	26.8953	26.85582	24.38424	26.84675	28.23834	29.70538	31.06175	25.06063	27.70687	27.97603	25.33981	27.31958	28.83715	29.89874	31.12281	0	1	0	6	4	8	4	2
1993	25.82068	27.8967	28.0871	25.65723	27.06613	27.86824	28.9486	30.84288	31.01207	31.48417	30.65557	30.02485	32.09525	31.70381	31.04018	32.82036	28.29	30.13604	30.50156	26.52291	28.78652	29.73827	30.53642	32.53559	28.40201	29.86008	29.76613	27.42063	29.34042	29.79078	30.1884	32.07958	11	7	4	6	9	10	4	11
1994	26.61899	27.26932	27.88716	25.77774	26.6104	27.9114	29.08521	31.81805	26.24476	27.16661	27.57503	26.99547	28.00528	28.11948	29.34444	30.79659	25.69202	27.17594	28.00721	24.90369	26.51211	27.84469	28.67317	30.61452	26.18054	27.20325	27.82244	25.89355	27.04729	27.95904	29.03372	31.06833	0	0	0	0	0	0	0	3
1995	24.34001	26.57945	26.39204	23.59345	25.42227	27.04063	28.43173	30.1194	28.53943	30.04636	30.58646	28.22685	29.94004	30.48863	30.42645	31.78293	29.79435	30.21632	31.30885	27.65424	29.27835	30.28554	30.93551	33.0676	27.59291	28.97312	29.46213	26.52302	28.24389	29.29585	29.94753	31.67335	8	7	8	8	8	7	4	6
1996	25.64389	27.07494	27.09028	24.6981	26.02641	27.49834	27.7581	29.81211	27.21713	29.65223	29.9202	26.48706	28.75124	30.51894	30.9813	33.17178	26.00603	27.25458	27.47367	24.35545	25.81013	27.52781	29.31237	31.97445	26.29603	28.00391	28.17303	25.18544	26.87168	28.52608	29.3679	31.67279	0	0	1	2	2	4	0	3
1997	23.28748	24.78772	25.97183	22.72968	23.58649	25.93674	28.21698	31.19558	28.67254	29.73019	29.44489	27.66744	28.66657	30.16306	30.60226	32.85073	25.84911	27.89744	28.46681	25.66368	26.67331	28.93075	30.06046	33.28733	25.96517	27.50096	27.9828	25.38212	26.33838	28.36968	29.64189	32.45812	6	2	4	4	1	5	3	18
1998	28.44446	31.18241	31.25789	27.13456	29.50591	31.86747	32.13831	34.76782	28.99946	31.04038	31.64067	28.28911	30.54814	31.4668	31.59107	34.22899	27.18038	29.25465	30.53596	26.69118	27.98542	29.58584	31.9319	33.68845	28.20553	30.48498	31.14361	27.3742	29.34476	30.96365	31.88436	34.22256	7	12	16	6	10	21	23	43
1999	25.23011	26.24025	27.98408	23.5263	24.46708	26.42568	27.33711	28.68433	29.24695	29.47444	30.27896	28.34936	29.36307	30.45142	30.87755	31.33397	28.25156	31.65558	32.80862	27.60882	30.58038	31.41228	30.71546	32.02721	27.60171	29.15476	30.38301	26.52709	28.17673	29.46245	29.66844	30.70355	9	11	16	10	16	13	8	8
2000	25.34572	27.62638	28.13153	25.35545	26.71182	27.44139	28.57791	29.60603	27.96344	30.12779	31.89625	25.63751	28.2753	29.55412	29.48728	31.56073	28.10784	29.21741	31.86304	25.44079	27.35864	29.22265	29.96851	30.62093	27.1585	29.00535	30.65743	25.47925	27.45659	28.7535	29.3529	30.60666	2	4	24	2	1	3	0	1
2001	24.13668	26.16548	26.96916	24.90321	25.68451	26.14344	28.40257	29.84052	27.89954	29.06873	29.92733	25.24401	27.51247	28.11187	29.1906	30.60692	26.66716	27.86753	28.35808	26.92081	28.33794	28.27799	30.36264	31.62085	26.25726	27.71727	28.43394	25.69789	27.19454	27.52597	29.32856	30.69866	1	0	1	3	2	0	1	1
2002	25.59425	26.92971	27.38477	25.69624	26.33904	26.52582	27.47066	29.15391	27.99936	28.9449	29.69568	28.4602	29.85015	28.19927	29.69077	31.0138	27.50421	28.207	29.11964	26.92882	27.85778	27.24774	29.84567	31.09259	27.04824	28.03913	28.74802	27.0429	28.03388	27.33296	29.01901	30.43386	0	2	2	7	5	2	3	1
2003	23.39183	26.69328	27.34524	23.82278	25.66187	26.37677	28.78274	30.22161	26.60706	27.51469	28.3988	26.17478	27.76039	27.45207	30.40014	31.74539	27.30602	28.19799	29.52423	26.62636	28.34995	27.70635	29.51246	30.77984	25.79413	27.47708	28.43447	25.55999	27.27475	27.18711	29.57361	30.92316	0	0	0	0	0	0	0	2
2004	24.91236	27.46038	27.26421	24.8324	27.21203	27.42015	30.0549	30.64692	26.56695	29.7335	29.33016	26.52564	28.73131	28.61417	30.1395	31.0619	24.29622	28.12356	27.14869	24.23211	26.28255	27.62564	29.94759	31.44127	25.26228	28.44978	27.92142	25.20068	27.41077	27.89172	30.04725	31.05441	0	2	0	0	1	1	0	0
2005	25.39376	27.15425	27.51883	24.34796	25.76117	26.55395	28.30629	29.13396	27.98705	30.12851	29.97723	28.57822	30.30052	30.59481	32.7546	32.33249	28.59644	29.32169	30.10608	27.78092	29.35269	29.88514	32.54108	32.75647	27.34675	28.88678	29.21899	26.93013	28.50092	29.03801	31.23211	31.43235	6	6	4	6	6	4	24	2
2006	25.44893	27.64274	28.25653	23.84961	26.08513	26.39791	28.72836	29.41026	28.52469	29.62926	29.97694	27.33775	29.05692	28.43608	29.92244	30.50898	29.27394	30.54535	30.99788	27.57563	29.6723	29.82434	30.34102	31.14415	27.77419	29.29016	29.75995	26.28047	28.29522	28.23924	29.67411	30.36472	2	0	0	4	5	0	0	0
2007	26.30541	27.42754	27.55922	24.55881	26.42066	26.57861	28.10233	29.32659	26.54848	28.64904	27.77901	25.59453	27.46152	28.33805	30.0635	31.85673	31.06786	31.56003	31.59042	29.43974	31.62628	30.31465	32.02446	32.73579	27.99205	29.2316	28.99162	26.55246	28.52545	28.43035	30.08474	31.32789	11	10	9	6	9	5	7	1
2008	26.5158	27.86598	28.01824	26.83641	28.14297	27.12484	28.45769	30.01545	27.68476	28.85719	29.29387	26.35134	28.20125	27.72204	28.46159	30.2288	26.27692	27.94904	27.89926	25.73755	27.91891	27.88231	29.93798	31.6748	26.8292	28.22796	28.40798	26.30269	28.08711	27.5813	28.9578	30.64647	0	0	0	2	1	0	0	0
2009	27.27982	30.26119	29.95952	25.56211	28.28308	28.91362	29.52033	31.15102	25.64933	28.41947	29.01928	25.55838	27.93314	27.72237	29.91068	32.04245	26.0302	27.77905	28.18534	26.61512	28.33933	27.71704	31.76668	32.05083	26.30935	28.80423	29.04488	25.91567	28.18412	28.10902	30.40878	31.75459	1	9	6	0	2	3	5	4
2010	28.91514	29.93494	30.4894	28.16345	29.93149	29.16025	31.55538	32.73317	30.19518	31.38636	31.19746	28.87424	30.80095	30.79251	32.32977	32.19584	30.73524	31.65462	31.37989	28.18045	30.73201	31.33505	32.09925	32.92037	29.95975	31.00346	31.02804	28.40868	30.4942	30.44307	31.99958	32.61519	23	18	13	16	16	10	28	13
2011	27.78942	29.94112	30.73116	26.81122	29.07931	29.14496	29.36462	30.41291	29.96885	30.43613	30.28701	29.43422	30.99836	30.10054	31.41711	32.14172	28.7921	31.47866	31.78162	27.51138	30.13367	31.17675	31.61322	33.73215	28.86165	30.626	30.93546	27.93098	30.08122	30.15157	30.8139	32.11388	9	7	10	13	12	5	8	9
2012	25.61646	26.63673	27.44363	23.77745	24.87271	26.10562	27.97218	29.53914	29.55325	30.18008	29.2256	29.10553	30.60226	29.66041	30.40521	30.98255	26.39297	27.92754	28.25761	25.42304	26.89137	27.8198	30.18948	31.65265	27.20464	28.26563	28.31836	26.12727	27.48352	27.88103	29.53914	30.73767	5	3	2	7	7	1	0	0
2013	25.99593	27.80867	28.4387	24.68461	26.76778	27.96112	29.26986	30.31856	25.95317	27.14119	27.64924	26.5041	27.69526	27.71844	29.46489	29.95071	26.14723	28.09724	28.54522	25.0772	27.45769	28.96797	31.46461	31.27342	26.0325	27.68099	28.20858	25.42999	27.31277	28.21861	30.07511	30.51636	0	0	1	0	1	1	0	0
2014	25.67743	27.69467	27.30644	25.48819	27.71408	27.55049	27.92756	29.94888	25.47283	28.3997	27.87421	26.09351	28.77614	28.83189	30.01523	32.21945	26.72474	29.20839	29.35949	25.22608	28.4746	29.01066	31.21134	33.09454	25.96139	28.44229	28.18954	25.60384	28.32821	28.47428	29.7375	31.77391	0	4	1	0	3	2	4	1
2015	27.06778	28.48457	28.33218	27.27925	28.90017	27.83034	29.95395	30.52941	29.61797	31.11835	31.52797	28.23999	30.38967	29.84099	30.28938	31.84736	26.18435	29.72298	29.65287	26.01945	28.26211	28.62249	30.96237	32.09179	27.62941	29.78933	29.85404	27.17848	29.18707	28.77476	30.40677	31.49995	7	6	8	7	4	1	3	6
																																		43		42
